1  
2  
3  
4  
5  
6  
7  
8  
9  
10

**Biomechanics and energetics of walking on uneven terrain**

Alexandra S. Voloshina<sup>1,2</sup>, Arthur D. Kuo<sup>2</sup>, Monica A. Daley<sup>3</sup>, and Daniel P. Ferris<sup>1</sup>

<sup>1</sup>School of Kinesiology, University of Michigan, Ann Arbor, MI, USA

<sup>2</sup>Department of Mechanical Engineering, University of Michigan, Ann Arbor, MI, USA

<sup>3</sup>Comparative Biomedical Sciences, The Royal Veterinary College, London, UK

Corresponding author address: voloshis@umich.edu

11 **SUMMARY**

12 Walking on uneven terrain is more energetically costly than walking on smooth ground, but the  
13 biomechanical factors that contribute to this increase are unknown. To identify possible factors, we  
14 constructed an uneven terrain treadmill that allowed us to record biomechanical, electromyographic, and  
15 metabolic energetics data from human subjects. We hypothesized that walking on uneven terrain would  
16 increase step width and length variability, joint mechanical work, and muscle co-activation compared to  
17 walking on smooth terrain. We tested healthy subjects ( $N=11$ ) walking at 1.0 m/s, and found that, when  
18 walking on uneven terrain with up to 2.5 cm variation, subjects decreased their step length by 4% and  
19 did not significantly change their step width, while both step length and width variability increased  
20 significantly (22% and 36%, respectively;  $p<0.05$ ). Uneven terrain walking caused a 28% and 62%  
21 increase in positive knee and hip work, and a 26% greater magnitude of negative knee work (0.0106,  
22 0.1078, and 0.0425 J/kg, respectively;  $p<0.05$ ). Mean muscle activity increased in seven muscles in the  
23 lower leg and thigh ( $p<0.05$ ). These changes caused overall net metabolic energy expenditure to increase  
24 by 0.73 W/kg (28%;  $p<0.0001$ ). Much of that increase could be explained by the increased mechanical  
25 work observed at the knee and hip. Greater muscle co-activation could also contribute to increased  
26 energetic cost but to unknown degree. The findings provide insight into how lower limb muscles are  
27 used differently for natural terrain compared to laboratory conditions.

## 28 INTRODUCTION

29 Animals and humans navigate complex terrain in their everyday lives. From uneven sidewalks to natural  
30 trails, humans often encounter surfaces that are not smooth. Energetic cost for locomotion increases on  
31 natural complex surfaces (e.g. grass, sand, snow; e.g. Davies and Mackinnon, 2006; Pandolf et al., 1976;  
32 Pinnington and Dawson, 2001; Soule and Goldman, 1972) compared to smooth surfaces, but the  
33 biomechanical mechanisms responsible for the increased cost are still unclear. Terrain has many features  
34 that might affect locomotion, such as height variations, damping, and coefficient of friction. These could  
35 cause a variety of changes to locomotion, yet gait research has typically focused on smooth, level  
36 ground. To provide some insight into how complex natural terrain can affect locomotion, we therefore  
37 studied metabolic energy expenditure and biomechanics of human walking on a synthesized uneven  
38 terrain surface.

39

40 There are a number of potential factors that could contribute to greater energy expenditure when  
41 walking on uneven terrain compared to smooth terrain. Adjusting step parameters during locomotion is  
42 one such factor. Adults typically take shorter and wider steps with increasing age (Murray et al., 1969),  
43 while younger individuals respond similarly to continuous perturbations, both physical and visual (Hak  
44 et al., 2012; McAndrew et al., 2010). If these are strategies to enhance stability, it is possible that  
45 younger adults might do the same on uneven terrain. Such terrain may also perturb gait from step to step  
46 and cause greater variability. Step width, in particular, would show increased variability, because lateral  
47 balance may be more dependent on active stabilization than fore-aft motion, due to passive dynamic  
48 stability (Donelan et al., 2001). Energy expenditure would be expected to increase with changes in mean  
49 step parameters (Gordon et al., 2009; Wade et al., 2010) and with changes in step variability as well  
50 (O'Connor et al., 2012).

51

52 Uneven terrain might also require more mechanical work from the legs, independent of the effect on  
53 step parameters. Kuo (2002) previously hypothesized that walking economy is improved by pushing off  
54 with the trailing leg just prior to the collision of the leading leg. Push-off redirects the body center of  
55 mass and, if properly timed, can reduce the amount of negative work performed in the collision. Uneven  
56 terrain may upset the relative timing of these events, so that a collision occurring either earlier or later  
57 relative to push-off would be expected to lead to greater negative mechanical work. This would then  
58 require muscles to compensate and actively do more positive work elsewhere, as steady walking  
59 requires zero work on average. It is difficult to predict how work will be distributed between the lower

60 limb joints, but perturbed timing would be expected to require more work overall, and thus more  
61 expenditure of metabolic energy.

62

63 Another possible factor contributing to increased energy expenditure is co-activation of muscles. When  
64 walking on less secure surfaces such as railroad ballast or ice (Cappellini et al., 2010; Marigold and  
65 Patla, 2002; Wade et al., 2010), or when there is an unexpected drop in the surface (Nakazawa et al.,  
66 2004), humans increase muscle co-activation about the ankle joint. This compensation may help to  
67 stabilize the joints for uncertain conditions. If humans co-activate the corresponding muscles on uneven  
68 terrain, energy expenditure may increase even if work does not.

69

70 The purpose of this study was to determine the changes in walking biomechanics on uneven terrain, and  
71 how they might relate to increased metabolic cost. We developed an uneven terrain surface that allowed  
72 us to collect continuous kinematic and energetics data during treadmill and over-ground walking. We  
73 expected that walking on uneven terrain would increase the variability of step width and step length.  
74 Humans may also adopt wider and shorter steps as a stabilizing strategy, similar to the changes that  
75 older adults make to compensate for poorer balance. Regardless of strategy, the perturbations of uneven  
76 terrain would be expected to cause subjects to increase joint mechanical work and muscle co-activation  
77 on uneven terrain compared to walking on smooth terrain. Walking over natural surfaces involves much  
78 greater variation than a smooth treadmill belt or uniform pavement; thus, biomechanics and energetics in  
79 uneven terrain are likely to better represent the functional demands that have influenced the evolution of  
80 human bipedalism (Pontzer et al., 2009; Sockol et al., 2007).

81

82

## 83 **METHODS**

84 We created an uneven terrain surface by attaching wooden blocks to a treadmill belt. This allowed us to  
85 collect biomechanical data and metabolic energetics data simultaneously during continuous walking.

86 The same terrain surface could also be placed over ground-embedded force plates, facilitating collection  
87 of joint kinetics data. Each wooden block was covered with a layer of ethylene-vinyl acetate (EVA)  
88 cushioning foam, to make the surface comfortable to walk on. To test for effects of the cushioning foam  
89 alone, subjects also walked on a smooth treadmill belt surface covered only by the cushioning foam,  
90 resulting in conditions termed “Uneven + Foam” and “Even + Foam.” We also tested walking on just  
91 the normal treadmill belt, termed the “Even” condition. We collected kinematic, kinetic, metabolic, and  
92 electromyographic data for each condition, all at a walking speed of 1.0 m/s.

93

## 94 **Subjects**

95 Eleven young, healthy subjects (four female, seven male, mean  $\pm$  standard deviation (SD): age  $22.9 \pm$   
96  $2.8$  years, mass  $66.1 \pm 13.2$  kg and height  $172.6 \pm 6.4$  cm) participated in the study. Data were collected  
97 in two sessions on separate days. One session was for treadmill walking to collect oxygen consumption  
98 ( $N = 7$ ), step parameter data ( $N = 9$ ), and electromyographic data ( $N = 8$ ). The other session was for  
99 over-ground walking over force plates to collect joint kinematics and kinetics ( $N = 10$ ). Some data were  
100 not collected successfully due to technical and logistical issues, resulting in values of  $N$  less than eleven  
101 in each data subset, noted in parentheses above. Due to these issues, different subject data were excluded  
102 from step parameter, kinematic and kinetic, and electromyographic data. Subjects provided written  
103 informed consent before the experiment. All procedures were approved by the University of Michigan  
104 Health Sciences Institutional Review Board.

105

## 106 **Walking Surfaces and Trial Procedures**

107 We modified a regular exercise treadmill (JAS Fitness Systems, Trackmaster TMX22, Dallas, TX) to  
108 allow for attachment and replacement of uneven and even terrain surfaces (Fig.1). The uneven surface  
109 was created from wooden blocks arranged in squares ( $15.2 \times 15.2$  cm) and glued together to form three  
110 different heights (1.27, 2.54, and 3.81 cm) and create an uneven surface (after Sponberg and Full, 2008).  
111 Each square consisted of smaller blocks,  $2.55 \times 15.2$  cm, oriented lengthwise across the belt and affixed  
112 to it with hook-and-loop fabric. The short dimension of the blocks allowed the belt to curve around the  
113 treadmill rollers. Each block's surface was covered with a layer of cushioning foam that was 1.27 cm  
114 thick, yielding a surface condition referred to as Uneven + Foam. Even though the uneven squares were  
115 arranged in a repeating pattern, their length was not an integer fraction of step length, making it difficult  
116 for subjects to learn or adopt a periodic compensation for this condition.

117

118 The two other surfaces served as control conditions. The Even + Foam condition was formed using only  
119 cushioning foam of the same height as the Uneven + Foam condition. The Even condition consisted of  
120 the treadmill belt alone, and allowed us to determine the biomechanical effects of only the cushioning  
121 foam.

122

123 Walking trials were performed for all three conditions in randomized order, both on treadmill and over-  
124 ground. All trials were completed with subjects walking at 1.0 m/s while wearing rubber-soled socks for  
125 comfort. Subjects were instructed to walk naturally and encouraged not to look down at their feet unless

126 they felt unstable. Subjects participated in only one 10-minute long treadmill trial per condition with at  
127 least 5 minutes of resting time between trials. During over-ground trials, speed was verified by optical  
128 timers set 4 m apart mid-way in a 7 m path, and trials were only used if they were within 10% of the  
129 target time. Subjects completed at least 10 successful over-ground trials for each surface condition.

130

### 131 **Kinetics and Kinematics**

132 For all walking trials (both on the treadmill and over-ground), we recorded the position of 31 reflective  
133 markers located on the pelvis and lower limbs using a 10-camera motion capture setup (frame rate:  
134 100Hz; Vicon, Oxford, UK). Markers were taped to the skin or spandex shorts worn by the subjects.  
135 Three markers were placed on each thigh and shank, one at the sacrum and one at each of the greater  
136 trochanters, anterior superior iliac spine, the medial and lateral epicondyles of the femur, the medial and  
137 lateral malleoli, the fifth metatarsals, the calcanei, and the first metatarsals. Medial markers were  
138 removed after static marker calibration. Only the last 2.5min of kinematic data collected from each  
139 treadmill trial were used for calculations. Over-ground trials occurred over two force plates, yielding one  
140 to two steps per trial for inverse dynamics calculations. The marker data for both legs were low-pass  
141 filtered at 6 Hz to reduce motion artifact (4<sup>th</sup> order Butterworth filter, zero-lag), and used to calculate  
142 step widths, lengths and heights, as well as to identify successful steps in over-ground trials. Step  
143 parameters were calculated using the calcaneous markers on the two feet. Step width and length were  
144 defined as the lateral and fore-aft distances between the two markers at their respective heel-strike  
145 instants. Step height was defined as the vertical distance between the two markers at heel-strike, and was  
146 only used to indicate greater step height variability expected from uneven terrain. Heel-strike was  
147 defined by the onset of ground force for over-ground trials, and by the lowest height of the calcaneous  
148 marker for treadmill trials (where forces were not measured). Over-ground data were used to confirm  
149 that these timings agreed well with each other. All step measurements were normalized to subject leg  
150 length, defined as the average vertical distance between the greater trochanter and calcaneous markers of  
151 both legs.

152

153 The Uneven + Foam and Even + Foam surfaces could be detached from the treadmill and used as a  
154 walkway. During over-ground trials, subjects walked across these two walking surfaces placed on top of  
155 two in-ground force platforms, 0.5 m apart (sample rate: 1000Hz; AMTI, Watertown, MA) for the  
156 Uneven + Foam and Even + Foam conditions. The surfaces were not secured to the floor, but did not  
157 appear to slip during walking trials. For the Even condition, subjects walked on the bare floor and force  
158 plates. The in-ground force plates were re-zeroed between conditions. All force data were low-pass

159 filtered at 6 Hz (4<sup>th</sup> order Butterworth filter, zero lag) and ground reaction force data were synchronized  
160 with the kinematic data. Joint angles, moments and powers for the stance limb were determined using  
161 inverse dynamics analysis in Visual-3D (C-Motion Inc., Germantown, MD). Positive and negative joint  
162 work measures were calculated by integrating the intervals of either positive or negative joint power  
163 over time.

## 165 **Electromyography**

166 We measured electromyography (EMG) in the tibialis anterior (TA), soleus (SO), medial gastrocnemius  
167 (MG), lateral gastrocnemius (LG), rectus femoris (RF), vastus medialis (VM), vastus lateralis (VL) and  
168 the semitendinosus of the medial hamstring (MH) muscles, during all treadmill trials. All EMG data  
169 were collected only for the right leg. Bipolar surface electrodes (sample rate: 1000 Hz; Biometrics Ltd.,  
170 Ladysmith, VA) were placed over the belly center of the muscle and in parallel to the muscle according  
171 to the procedure of Winter and Yack (1987). The inter-electrode distance was 2.0 cm for all trials and  
172 electrode diameters were 1.0 cm. The EMG amplifier had a bandwidth of 20 Hz – 460 Hz. As with other  
173 measurements, only the last 2.5 min of EMG data were used for data analysis. All electromyography  
174 signals were high-pass filtered with a 20 Hz cutoff-frequency (4<sup>th</sup> order Butterworth filter, zero-lag) and  
175 then full-wave rectified. We then normalized each muscle's data to the maximum activation observed  
176 for that same muscle over all three conditions for that subject (Winter and Yack, 1987; Yang and  
177 Winter, 1984) and averaged over subjects to create representative EMG profiles. Standard deviations of  
178 the EMG traces were found at each time point for every subject and condition and also averaged, to  
179 determine mean standard deviation envelopes. Although the relationship between EMG variability and  
180 metabolic cost is undetermined, this measure can indicate the level of perturbation to gait mechanics  
181 from uneven terrain. To determine increases in muscle activation, we found the average of the  
182 normalized EMG profile for each subject and condition. These average values were then averaged over  
183 subjects. In addition, we assessed muscle co-activation as the amount of mutual contraction (MC) as  
184 defined by Thoroughman and Shadmehr (1999) to indicate “wasted” contraction, for each stride for  
185 three pairs of antagonistic muscles (SO/TA, MH/VM, MH/VL). To do so, we used the equation:

$$MC = \int \min(f_1, f_2) dt$$

186 where  $f_1$  and  $f_2$  are the full-wave rectified EMG profiles, averaged over one hundred steps, of the two  
187 antagonistic muscles and  $\min(f_1, f_2)$  is the minimum of the two profiles at each time point. Integrals were  
188 computed over the duration of the whole stride and in 1% increments to identify where in the stride  
189 cycle mutual contraction occurred.

190

## 191 **Metabolic Rate**

192 For all treadmill walking conditions, we measured the rate of  $\text{VO}_2$  using an open-circuit respirometry  
193 system (CareFusion Oxycon Mobile, Hoechberg, Germany). We recorded 7 minutes of respirometry  
194 data during a quiet standing trial, and 10 minutes for all walking trials. Although 3-minute trials are  
195 sufficient to reach steady-state energy expenditure on uniform terrain (Poole and Richardson, 1997), we  
196 expected walking on uneven terrain to be an increase in exercise intensity and allowed subjects 7.5  
197 minutes of walking to reach steady-state before collection 2.5 minutes of data. We later confirmed that  
198 subjects had reached steady-state in both biomechanics and energetics on the novel terrain conditions by  
199 checking that no adaptation trends were still present in the last 2.5 minutes of data. We calculated the  
200 metabolic energy expenditure rate of each subject using standard empirical equations yielding metabolic  
201 rate  $\dot{E}_{\text{met}}$  (in W) (Brockway, 1987; Weir, 1949). Net metabolic rate was found by subtracting the  
202 standing metabolic power from the metabolic power of all other conditions. We normalized the net  
203 metabolic power for all conditions by dividing by subject body mass (kg).

204

## 205 **Data and Statistical Analyses**

206 To compare changes in variability for step parameter, joint parameter and EMG data, we averaged the  
207 variability for each of the three conditions over all subjects. For step data, we defined variability as the  
208 standard deviation of contiguous step distances or periods over time, for each subject. For joint  
209 parameter and EMG data, means are found across trials for each point in relative stride cycle timing.  
210 Similarly, joint parameter and EMG variability was defined for each subject and condition as the  
211 standard deviation across trials for each point. We then report the mean variations (and standard  
212 deviations) across subjects for each condition. Differences between the conditions were quantified by  
213 performing repeated-measures ANOVAs on the data sets of interest. The significance level  $\alpha$  was set at  
214 0.05 and post hoc Holm-Sidak multiple comparison tests were performed where appropriate.

215

## 216 **RESULTS**

217 Walking on uneven terrain resulted in a variety of changes to gait compared to walking on smooth  
218 terrain. Subjects walked with slightly shorter step lengths and substantially increased step variability.  
219 Gait kinematics remained similar overall but knee and hip mechanical work increased on uneven terrain.  
220 We also observed increased mean activity among multiple proximal leg muscles (VM, VL, RF, MH),  
221 and greater muscle mutual contraction about all three joints on uneven terrain. In all variables, the two  
222 smooth terrain conditions (with and without a foam layer) exhibited negligible differences between each



223 other. We therefore report comparisons mainly between the Uneven + Foam and Even + Foam  
224 conditions.

225

## 226 **Kinetics and Kinematics**

227 Although mean step parameters changed little, there were large changes in step variability during  
228 walking on the uneven surface when compared to the even foam surface (Table 1). Of the mean step  
229 distances, only step length changed significantly, decreasing by 3.7%. Because walking speed was kept  
230 fixed, this was accompanied by a 3.7% decrease in mean step duration. Variability of step width, length  
231 and height all increased significantly by about 35%, 23%, and 105%, respectively. Step period  
232 variability also increased significantly by 26.7%.

233

234 A number of effects were observed on joint kinematics and kinetics when subjects walked on uneven  
235 terrain when compared to the even surface (Fig. 2). Qualitative examination of sagittal plane joint angles  
236 on uneven terrain suggest slightly greater knee and hip flexion at mid-swing, perhaps associated with  
237 greater ground clearance of the swing foot. Mean ankle angle trajectory changed little (Fig. 2). However,  
238 on uneven terrain, we observed larger effects on the joint moments during stance, with increased knee  
239 flexion and increased hip extension moments at mid-stance. At the end of stance during push-off, these  
240 patterns reversed, with greater knee extension and hip flexion moments. The main changes in joint  
241 power were also confined to the knee and hip, with increased peak powers, especially at push-off (by  
242 about 65% and 85%, respectively) when walking on the uneven surface. Hip power also increased by  
243 75% during mid-stance, at about 20% of stride time. Toe-off timing in the stride cycle did not appear to  
244 differ between conditions. Joint trajectories were more variable on uneven terrain (Fig. 2). The ankle  
245 angle variability more than doubled on uneven terrain, while the knee and hip variability increased by  
246 about 30% (all  $p < 0.05$ ). The mean ankle and knee torque variability both increased by approximately  
247 50% (all  $p < 0.05$ ). All joint power variability also increased by 50% or more on the uneven terrain  
248 condition (all  $p < 0.05$ ).

249

250 The biomechanical effects included greater joint work performed over a stride (Fig. 3). There was a  
251 0.0106 J/kg (28%) increase in positive knee work and a 0.0425 J/kg (26%) increase in negative knee  
252 work ( $p = 0.011$  and  $p = 0.0019$ , respectively). Positive hip work also significantly increased by 0.1078  
253 J/kg (62%;  $p < 0.0001$ ). No statistically significant changes were found in positive or negative ankle  
254 work, or negative hip work.

255

## 256 **Muscle Activation**

257 Subjects showed increased muscle activity, variability of activity (Fig. 4), and mutual contraction when  
258 walking on the uneven surface. There were significant increases in activation for six of the eight muscles  
259 measured (Fig. 5). Averaged, normalized EMG values increased for all of the thigh muscles: VM, VL,  
260 RF and MH increased by 49%, 60%, 54% and 47%, respectively ( $p < 0.05$ ). In the lower leg, SO muscle  
261 activity increased by 28%, while the MG muscle activity increased by 17% ( $p < 0.05$ ). The remaining  
262 muscles, TA and LG, did not exhibit significant changes in mean activity across the stride, although TA  
263 appeared to have slightly decreased activity in the first 10% of stride.

264

265 Variability of EMG increased significantly for nearly all muscles on the uneven terrain (Fig. 4). On  
266 average, walking on uneven terrain resulted in a larger increase in variability (standard deviation of  
267 muscle activity) in the thigh muscles (mean 60% increase) than in the leg muscles (mean 30% increase).  
268 For the thigh muscles, RF and VL variability increasing over 80% ( $p < 0.05$ ), and VM and MH muscles  
269 showed over 45% increases ( $p < 0.05$ ). The SO, MG and LG muscles in the leg showed a minimum  
270 increase in standard deviation of 27%, and as much as 40% for MG ( $p < 0.05$ ).

271

272 We also observed changes in co-contraction over the entire stride for all three pairs of antagonistic  
273 muscles (Table 2). However, upon breaking the stride down into 1% increments, mutual activation for  
274 the MH/VM and MH/VL muscle pairs appears to increase substantially only around mid-stance. The  
275 MH/VL muscle pair also shows a significant increase pre toe-off. The largest increase of mutual  
276 contraction of the TA/SO muscles was seen shortly after heel-strike (Fig. 4).

277

## 278 **Metabolic Energy Expenditure**

279 Walking on the uneven terrain resulted in a significant increase in energy expenditure compared to the  
280 other surfaces (Fig. 6). Net metabolic rate increased from 2.65 W/kg (s.d. 0.373 W/kg) to 3.38 W/kg  
281 (s.d. 0.289 W/kg) ( $p < 0.0001$ ), about 28%, from the even foam to uneven terrain. There was no  
282 difference between the energetic cost of walking on the even surface (mean metabolic rate of 2.53 W/kg;  
283 s.d. 0.282 W/kg) and the even foam surface ( $p = 0.330$ ). Average standing metabolic rate was found to  
284 be 1.48 W/kg (s.d. 0.181 W/kg).

285

## 286 **DISCUSSION**

287 On natural terrain, there are many surface properties that can dictate the metabolic cost of locomotion.  
288 Surface compliance and damping can affect locomotion energetics and dynamics (Ferris et al., 1998;

289 Ferris et al., 1999; Kerdok et al., 2002) as do surface inclines or declines (Margaria, 1976; Minetti et al.,  
290 1993). However, few studies have characterized the biomechanics and energetics of walking on uneven  
291 surfaces. We examined the effects of uneven terrain compared to smooth surfaces, and found a number  
292 of biomechanical factors related to energetic cost. Locomotion on terrain with a surface variability of  
293 only 2.5 cm resulted in a 28% increase in net metabolic cost. For comparison, this is approximately  
294 energetically equivalent to walking up a 2% steady incline (Margaria, 1968) and is likely comparable to  
295 natural terrain variation experienced when moving over trails, grass or uneven pavement.

296

297 We observed only modest changes in stepping strategy with uneven terrain. For example, average step  
298 length decreased by only 4%, and the increase in step width was not significant. Examination of  
299 previous studies on the effects of varying step parameters (Donelan et al., 2001; Gordon et al., 2009;  
300 O'Connor and Kuo, 2009) suggests that differences seen here are too small to have a substantial  
301 influence on energetic cost. However, we did observe a 22% increase in step length variability and a  
302 36% increase in step width variability. As shown by others (Donelan et al., 2004; O'Connor et al.,  
303 2012), it is costlier to walk with more variability (e.g. 65% greater step width variability results in 5.9%  
304 higher energetic cost), in part because increased step variability reduces the use of passive energy  
305 exchange and increases step-to-step transition costs. However, the differences we found in our study  
306 would not likely translate to large changes in energetic cost. Available evidence suggests that changes in  
307 step distances and variability could account for only a small percent of increased energy expenditure.

308

309 One of the biomechanical effects that might explain the energetic cost differences were the amount and  
310 distribution of work by lower limb joints. Work performed by the ankle over a stride did not change  
311 appreciably on the uneven surface, but the hip performed 62% more positive work and the knee 26%  
312 more negative work (Fig. 3). The greater positive work at the hip occurred during mid-stance and also at  
313 push-off, as corroborated by increased medial hamstring and rectus femoris activity (Figs. 4 and 5). The  
314 hip accounted for nearly all of the increase in positive joint work. Changes in positive joint work relative  
315 to changes in metabolic energy cost yields a *delta efficiency* ( $\Delta\text{Eff} = \Delta\dot{W}^+ / \Delta\dot{E}$ ) of about 32% (Fig. 7). If  
316 all of the increased metabolic energy cost of walking on uneven terrain came exclusively from positive  
317 muscle work, then the delta efficiency would equal approximately 25% (Margaria, 1968). A very low  
318 efficiency would imply that energy is expended for costs other than work, such as increased co-  
319 activation and force of contraction. But the relatively high  $\Delta\text{Eff}$  observed here suggests that the cost of  
320 walking on uneven terrain may largely be explained by greater mechanical work, mostly performed at  
321 the hip.

322

323 By exceeding 25% delta efficiency, the data also suggest that not all of the changes in joint positive  
324 work were due to active muscle work. Joint power trajectories (Fig. 2) reveal that some of the positive  
325 hip work was performed simultaneously with negative knee work at toe-off (at about 60% of stride  
326 time). The rectus femoris muscle is biarticular and can flex the hip and extend the knee at the same time.  
327 It can thus produce both higher positive work at one joint and a greater negative work at the other, yet  
328 experience a smaller change in actual muscle work. In addition, some joint work may be performed  
329 passively through elastic energy storage and return by tendon, as has been implicated most strongly for  
330 the ankle (Sawicki et al., 2009) but also in the knee and hip (Doke and Kuo, 2007; Geyer et al., 2006). It  
331 is therefore likely that positive joint work is an overestimate of actual muscle work, which could explain  
332 the relatively high delta efficiency. It is nevertheless evident that there was substantially more positive  
333 work at the hip, even discounting hip power at toe-off. The work increase in the first half of stride is not  
334 easily explained by simultaneous negative work at another joint, nor by passive elastic work. It therefore  
335 appears that much of the increase in metabolic cost could still be explained by active joint work, at a  
336 more physiological efficiency.

337

338 A possible explanation for the joint work increase on uneven terrain is the timing of push-off and  
339 collision during walking. Push-off by the trailing leg can reduce negative work done by the leading leg if  
340 it commences just before heel-strike, redirecting the body center of mass prior to collision (Kuo, 2002;  
341 Kuo et al., 2005). Stride period was quite consistent on level ground, with variability of about 0.014 s,  
342 but increased by about 27% on uneven terrain. This may suggest greater variability in timing between  
343 push-off and collision, which may contribute to greater variability of joint power and muscle activity to  
344 compensate for collision costs (Fig. 2 and Fig. 4, respectively). A more direct test would be to compare  
345 variations in consecutive push-off and collision phases. The present force data did not include  
346 consecutive steps, and so the proposed effect on redirecting the body center of mass remains to be  
347 tested.

348

349 Subjects also appeared to have modified their landing strategy following heel-strike. As an indicator of  
350 such adaptations, we examined the effective leg length during stance, defined as the straight-line  
351 distance from sacrum to calcaneous marker of the stance foot, normalized to subject leg length. The  
352 maximum effective leg length occurred immediately after heel-strike, and was reduced by about 2.4%  
353 on uneven terrain (1.140, 0.028 s.d. for Even + Foam; 1.113, 0.026 s.d. for Uneven + Foam;  $p < 0.0001$ ).  
354 This may suggest that subjects adopted a slightly more crouched posture on uneven terrain, perhaps

355 associated with increased EMG activity in the thigh muscles. Past research has suggested that vertical  
356 stiffness decreases with a more crouched posture, for both human running (McMahon et al., 1987) and  
357 walking (Bertram et al., 2002). A more crouched limbed posture on uneven terrain might also increase  
358 compliance and provide a smoother gait, albeit at higher energetic cost. We also observed decreased  
359 tibialis anterior activation at heel strike, which may be associated with adaptations for variable  
360 conditions at heel-strike. These overall changes to landing strategy, along with increased variability in  
361 stride period duration, may have contributed to increased joint work and energetic cost during walking  
362 on uneven terrain.

363

364 There are other factors that may have contributed to the increased energetic cost of walking on uneven  
365 terrain compared to even terrain. Co-activation of muscles about a joint can lead to increased metabolic  
366 cost in human movement (Cavanagh and Kram, 1985). Although our data suggest an increase in mutual  
367 muscle contraction about the ankle and knee joints (Table 2), it is difficult to convert relative amounts of  
368 co-activation to a prediction of energetic cost. The increased vastus lateralis and vastus medialis activity  
369 during stance (Figs. 4 and 5) could also lead to greater energy expenditure. Although much of that cost  
370 could be quantified by knee power, production of muscle force may also have an energetic cost beyond  
371 that for muscle work (Dean and Kuo, 2009; Doke and Kuo, 2007). Although we cannot estimate a cost  
372 for co-activation or force production, it is quite possible that they contributed to the increased metabolic  
373 cost on uneven terrain.

374

375 There were several limitations to this study. A limitation of the data setup was the arrangement of the  
376 force plates during over-ground trials. Force plates placed consecutively would have allowed us to  
377 collect force data during consecutive steps and to analyze simultaneous work by the leading and trailing  
378 legs. Another limitation was that subjects walked at a controlled walking speed. This might have  
379 constrained their freedom to negotiate terrain by varying their speed. We also did not test a range of  
380 walking speeds to determine if uneven terrain causes an altered relationship between energy cost and  
381 speed. We also tested only one pattern and range of surface heights, with the expectation that greater  
382 height variation would largely have a magnified effect on energetics. Subjects were also given little time  
383 to become accustomed to the uneven terrain. We had assumed that everyday experience would allow  
384 them to adapt to uneven surface relatively quickly. There was also reduced ability for subjects to view  
385 the terrain surface ahead of them, due to the limited length of the treadmill. This did not seem to pose an  
386 undue challenge for the small perturbations here, but we would expect vision to be increasingly  
387 important with greater terrain variations (Patla, 1997).

388

389 This study characterizes some of the adaptations that might occur on uneven terrain. These include  
390 relatively minor adaptations in stepping strategy, increases in muscle activity, and additional work  
391 performed at the hip. A controlled experiment can hardly replicate the limitless variations of the actual  
392 environment, nor can it capture the entire range of compensations humans might perform in daily living.  
393 But this study does suggest that much of the energetic cost of walking on uneven terrain may be  
394 explained by changes in mechanical work from lower limb muscles. As a result, these findings can  
395 potentially influence future designs of robotic exoskeletons used to assist with locomotion on natural  
396 surfaces, as well as the development of various legged robots. In addition, numerous studies have been  
397 done on the biomechanics and energetics of locomotion in humans and other primates with the intent of  
398 highlighting factors driving the evolution of bipedal locomotion (Pontzer et al., 2009; Sockol et al.,  
399 2007). Our findings highlight that rather small changes in terrain properties (about 2.5 cm terrain height  
400 variation) can have substantial impact on muscular work distribution across the lower limb. Thus, future  
401 studies should take into account how properties of natural terrain, such as terrain height variability and  
402 terrain damping (Lejeune et al., 1998), can influence potential conclusions relating locomotion  
403 biomechanics and energetics of bipedal evolution.

404

#### 405 **ACKNOWLEDGMENTS**

406 The authors thank Sarah Weiss, and members of the Human Neuromechanics Laboratory and Human  
407 Biomechanics and Control Laboratory for assistance in collecting the data.

408

#### 409 **FUNDING**

410 This research was supported by a grant from the Army Research Laboratory [W911NF-09-1-0139 to  
411 D.F., W91 1NF-10-2-0022 to D.F.]; Department of Defense [W81XWH-09-2-0142 to A.K.]; Defense  
412 Advanced Research Projects Agency [Atlas Program to A.K.]; Office of Naval Research [ETOWL to  
413 A.K.]; and the University of Michigan Rackham Graduate Student Fellowship to A.V.

## REFERENCES

- 414 **Bertram, J. E., D'antonio, P., Pardo, J. and Lee, D. V.** (2002). Pace length effects in human  
415 walking: "Groucho" gaits revisited. *Journal of motor behavior* **34**, 309–318.
- 416 **Brockway, J.** (1987). Derivation of formulae used to calculate energy expenditure in man. *Hum*  
417 *Nutr Clin Nutr* **41**, 463–71.
- 418 **Cappellini, G., Ivanenko, Y. P., Dominici, N., Poppele, R. E. and Lacquaniti, F.** (2010). Motor  
419 patterns during walking on a slippery walkway. *Journal of Neurophysiology* **103**, 746–760.
- 420 **Cavanagh, P. R. and Kram, R.** (1985). Mechanical and muscular factors affecting the efficiency of  
421 human movement. *Medicine & Science in Sports & Exercise* **17**, 326.
- 422 **Davies, S. and Mackinnon, S.** (2006). The energetics of walking on sand and grass at various  
423 speeds. *Ergonomics* **49**, 651–660.
- 424 **Dean, J. and Kuo, A.** (2009). Elastic coupling of limb joints enables faster bipedal walking. *Journal*  
425 *of The Royal Society Interface* **6**, 561.
- 426 **Doke, J. and Kuo, A. D.** (2007). Energetic cost of producing cyclic muscle force, rather than work,  
427 to swing the human leg. *Journal of Experimental Biology* **210**, 2390–2398.
- 428 **Donelan, M. J., Kram, R. and Arthur D, K.** (2001). Mechanical and metabolic determinants of the  
429 preferred step width in human walking. *Proceedings of the Royal Society of London. Series B:*  
430 *Biological Sciences* **268**, 1985.
- 431 **Donelan, J. M., Shipman, D. W., Kram, R. and Kuo, A. D.** (2004). Mechanical and metabolic  
432 requirements for active lateral stabilization in human walking. *Journal of Biomechanics* **37**,  
433 827–835.
- 434 **Ferris, D. P., Louie, M. and Farley, C. T.** (1998). Running in the real world: adjusting leg stiffness  
435 for different surfaces. *Proc Biol Sci* **265**, 989–94.
- 436 **Ferris, D. P., Liang, K. and Farley, C. T.** (1999). Runners adjust leg stiffness for their first step on  
437 a new running surface. *J Biomech* **32**, 787–94.
- 438 **Geyer, H., Seyfarth, A. and Blickhan, R.** (2006). Compliant leg behaviour explains basic dynamics  
439 of walking and running. *Proc Biol Sci* **273**, 2861–7.
- 440 **Gordon, K. E., Ferris, D. P. and Kuo, A. D.** (2009). Metabolic and mechanical energy costs of  
441 reducing vertical center of mass movement during gait. *Archives of physical medicine and*  
442 *rehabilitation* **90**, 136–144.
- 443 **Hak, L., Houdijk, H., Steenbrink, F., Mert, A., Van der Wurff, P., Beek, P. J. and Van Dieën, J. H.**  
444 (2012). Speeding up or slowing down?: Gait adaptations to preserve gait stability in  
445 response to balance perturbations. *Gait & Posture*.
- 446 **Kerdok, A. E., Biewener, A. A., McMahon, T. A., Weyand, P. G. and Herr, H. M.** (2002).  
447 Energetics and mechanics of human running on surfaces of different stiffnesses. *Journal of*  
448 *Applied Physiology* **92**, 469–478.
- 449 **Kuo, A. D.** (2002). Energetics of actively powered locomotion using the simplest walking model.  
450 *Journal of Biomechanical Engineering* **124**, 113.
- 451 **Kuo, A. D., Donelan, J. M. and Ruina, A.** (2005). Energetic consequences of walking like an  
452 inverted pendulum: step-to-step transitions. *Exercise and sport sciences reviews* **33**, 88–97.
- 453 **Lejeune, T., Willems, P. and Heglund, N.** (1998). Mechanics and energetics of human locomotion  
454 on sand. *Journal of Experimental Biology* **201**, 2071.
- 455 **MacLellan, M. J. and Patla, A. E.** (2006). Adaptations of walking pattern on a compliant surface to  
456 regulate dynamic stability. *Experimental brain research* **173**, 521–530.
- 457 **Margaria, R.** (1968). Positive and negative work performances and their efficiencies in human  
458 locomotion. *European journal of applied physiology and occupational physiology* **25**, 339–  
459 351.
- 460 **Margaria, R.** (1976). *Biomechanics and energetics of muscular exercise*. Clarendon Press Oxford.

- 461 **Marigold, D. S. and Patla, A. E.** (2002). Strategies for dynamic stability during locomotion on a  
462 slippery surface: effects of prior experience and knowledge. *Journal of Neurophysiology* **88**,  
463 339–353.
- 464 **McAndrew, P. M., Dingwell, J. B. and Wilken, J. M.** (2010). Walking variability during continuous  
465 pseudo-random oscillations of the support surface and visual field. *Journal of biomechanics*  
466 **43**, 1470–1475.
- 467 **McMahon, T. A., Valiant, G. and Frederick, E. C.** (1987). Groucho running. *Journal of Applied*  
468 *Physiology* **62**, 2326–2337.
- 469 **Minetti, A. E., Ardigo, L. and Saibene, F.** (1993). Mechanical determinants of gradient walking  
470 energetics in man. *The Journal of physiology* **472**, 725–735.
- 471 **Murray, M. P., Kory, R. C. and Clarkson, B. H.** (1969). Walking patterns in healthy old men.  
472 *Journal of Gerontology* **24**, 169–178.
- 473 **Nakazawa, K., Kawashima, N., Akai, M. and Yano, H.** (2004). On the reflex coactivation of ankle  
474 flexor and extensor muscles induced by a sudden drop of support surface during walking in  
475 humans. *Journal of Applied Physiology* **96**, 604–611.
- 476 **O'Connor, S. M. and Kuo, A. D.** (2009). Direction-dependent control of balance during walking  
477 and standing. *Journal of Neurophysiology* **102**, 1411–1419.
- 478 **O'Connor, S. M., Xu, H. Z. and Kuo, A. D.** (2012). Energetic cost of walking with increased step  
479 variability. *Gait & Posture* **36**, 102–107.
- 480 **Pandolf, K., Haisman, M. and Goldman, R.** (1976). Metabolic energy expenditure and terrain  
481 coefficients for walking on snow. *Ergonomics* **19**, 683–690.
- 482 **Patla, A. E.** (1997). Understanding the roles of vision in the control of human locomotion. *Gait &*  
483 *Posture* **5**, 54–69.
- 484 **Pinnington, H. C. and Dawson, B.** (2001). The energy cost of running on grass compared to soft  
485 dry beach sand. *Journal of Science and Medicine in Sport* **4**, 416–430.
- 486 **Pontzer, H., Raichlen, D. A. and Sockol, M. D.** (2009). The metabolic cost of walking in humans,  
487 chimpanzees, and early hominins. *Journal of human evolution* **56**, 43–54.
- 488 **Poole, D. C. and Richardson, R. S.** (1997). Determinants of oxygen uptake. *Sports Med* **24**, 308–  
489 320.
- 490 **Sawicki, G. S., Lewis, C. L. and Ferris, D. P.** (2009). It pays to have a spring in your step. *Exercise*  
491 *and sport sciences reviews* **37**, 130.
- 492 **Sockol, M. D., Raichlen, D. A. and Pontzer, H.** (2007). Chimpanzee locomotor energetics and the  
493 origin of human bipedalism. *Proceedings of the National Academy of Sciences* **104**, 12265–  
494 12269.
- 495 **Soule, R. G. and Goldman, R. F.** (1972). Terrain coefficients for energy cost prediction. *Journal of*  
496 *Applied Physiology* **32**, 706–708.
- 497 **Sponberg, S. and Full, R.** (2008). Neuromechanical response of musculo-skeletal structures in  
498 cockroaches during rapid running on rough terrain. *Journal of Experimental Biology* **211**,  
499 433–446.
- 500 **Thoroughman, K. A. and Shadmehr, R.** (1999). Electromyographic correlates of learning an  
501 internal model of reaching movements. *The Journal of Neuroscience* **19**, 8573–8588.
- 502 **Wade, C., Redfern, M. S., Andres, R. O. and Breloff, S. P.** (2010). Joint kinetics and muscle  
503 activity while walking on ballast. *Human Factors: The Journal of the Human Factors and*  
504 *Ergonomics Society* **52**, 560–573.
- 505 **Weir, J. B. V.** (1949). New methods for calculating metabolic rate with special reference to protein  
506 metabolism. *The Journal of physiology* **109**, 1–9.
- 507 **Winter, D. and Yack, H.** (1987). EMG profiles during normal human walking: stride-to-stride and  
508 inter-subject variability. *Electroencephalography and clinical Neurophysiology* **67**, 402–411.



- 509 **Yang, J. and Winter, D.** (1984). Electromyographic amplitude normalization methods: improving  
510 their sensitivity as diagnostic tools in gait analysis. *Archives of physical medicine and*  
511 *rehabilitation* **65**, 517.
- 512 **Zamparo, P., Perini, R., Orizio, C., Sacher, M. and Ferretti, G.** (1992). The energy cost of walking  
513 or running on sand. *European journal of applied physiology and occupational physiology* **65**,  
514 183–187.

## FIGURE LEGENDS

515 **Fig. 1.** A) Treadmill with the uneven terrain surface attached. B) Schematic of the uneven surface  
516 layout, consisting of three alternating heights (arrows indicate the treadmill's long axis). C) Close-up  
517 representation of the individual blocks comprising each stepping area. Dimensions: H – 1.27cm; L –  
518 15.2cm; W – 2.54 cm.

519  
520 **Fig. 2.** Joint angles, torques, and powers vs. stride time for two terrain conditions. Mean trajectories for  
521 ankle, knee and hip are plotted against % stride time for Uneven and Even terrain (both with Foam)  
522 conditions. Shaded area denotes standard deviation across subjects for Uneven + Foam; dashed lines for  
523 Even + Foam. Strides start and end at same-side heel-strike; dashed vertical gray lines indicate toe-off.

524  
525 **Fig. 3.** Joint work per stride for three terrain conditions. Values shown are positive and negative work  
526 for ankle, knee, and hip, with error bars denoting standard deviations. Dashed lines indicate net work for  
527 that specific joint and condition. Asterisks signify a statistically significant difference of the Uneven +  
528 Foam condition from the other two conditions ( $\alpha = 0.05$ ).

529  
530 **Fig. 4.** Averaged EMG (electromyographic) activity vs. stride time for even and uneven terrain  
531 conditions. EMG data were normalized to the maximum activation of each muscle for each subject and  
532 plotted against % stride time for Uneven and Even terrain (both with Foam). Strides start and end at  
533 same-side heel-strikes; dashed vertical gray lines indicate toe-off. Envelopes indicate standard  
534 deviations for Uneven (shaded area) and Even terrain (dashed lines) conditions (both with Foam). Gray  
535 bars indicate statistically significant increases in mutual muscle contraction, with darker colors  
536 indicating larger percent increases, from even terrain mutual muscle contraction to uneven terrain  
537 mutual muscle contraction. Brackets indicate time of decreased muscle contraction. TA, tibialis anterior;  
538 SO, soleus; MG, medial gastrocnemius; LG, lateral gastrocnemius; VM, vastus medialis; VL, vastus  
539 lateralis; RF, rectus femoris; MH, medial hamstring.

540  
541 **Fig. 5.** Averaged rectified EMG values normalized to maximum muscle activation. Bars indicate  
542 standard deviation across subjects. Single asterisks denote statistically significant differences between  
543 the Uneven + Foam condition and the other two conditions. No statistically significant differences were  
544 found between the Even and Even + Foam conditions ( $\alpha = 0.05$ ).

545

546 **Fig. 6.** Net metabolic rate for three terrain conditions. Metabolic rates are normalized by subject mass.  
547 Values shown are averages over subjects, with error bars indicating standard deviations. Asterisk  
548 indicates a statistically significant difference between the Uneven + Foam walking condition and the  
549 other two conditions ( $\alpha = 0.05$ ).

550

551 **Fig. 7.** Delta efficiency  $\Delta\text{Eff}$  for Uneven vs. Even terrain, defined as the ratio between differences in  
552 positive mechanical power and metabolic power ( $\Delta\dot{W}^+$  and  $\Delta\dot{E}$ , respectively; plotted as filled circles,  
553 with units W/kg). Average joint power is shown for ankle, knee, and hip joints.

554

555 **Table 1.** Step parameters for three terrain conditions. Parameters include mean step length, width, and  
556 height and their respective variations (all normalized to subject leg length, mean 0.870 m), as well as  
557 step period. Shown are averages (and standard deviations, s.d.) across subjects. Step variability is  
558 defined as the standard deviation of step distances over a trial, reported as an average (and s.d.) across  
559 subjects. Asterisks signify a statistically significant difference of the Uneven + Foam condition from the  
560 other two conditions (post-hoc pair-wise comparisons,  $\alpha = 0.05$ ).

561

562 **Table 2.** Muscle mutual contraction for the entire stride for three terrain conditions. Values signify unit-  
563 less area under the minimum of the normalized EMG activation curves for the two muscles of interest.  
564 Three muscle antagonist pairs are compared: TA/SO for tibialis anterior/soleus, MH/VM for medial  
565 hamstring/vastus medialis, MH/VL for medial hamstring/vastus lateralis. Asterisks signify a statistically  
566 significant difference of the Uneven + Foam condition ( $\alpha = 0.05$ ). Standard deviations indicate  
567 variation between subjects.

**Fig. 1.**

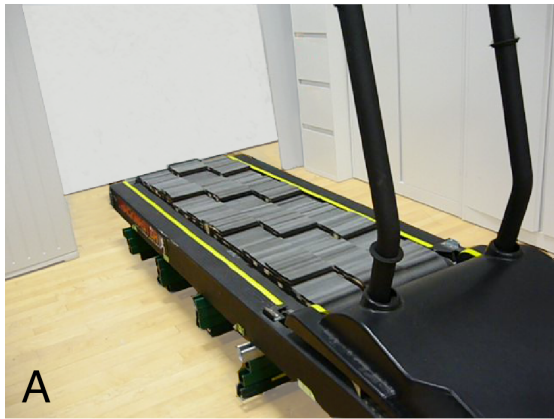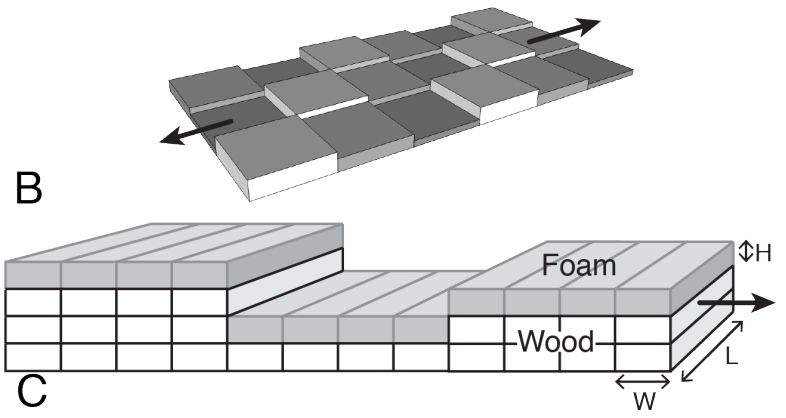

Fig. 2.

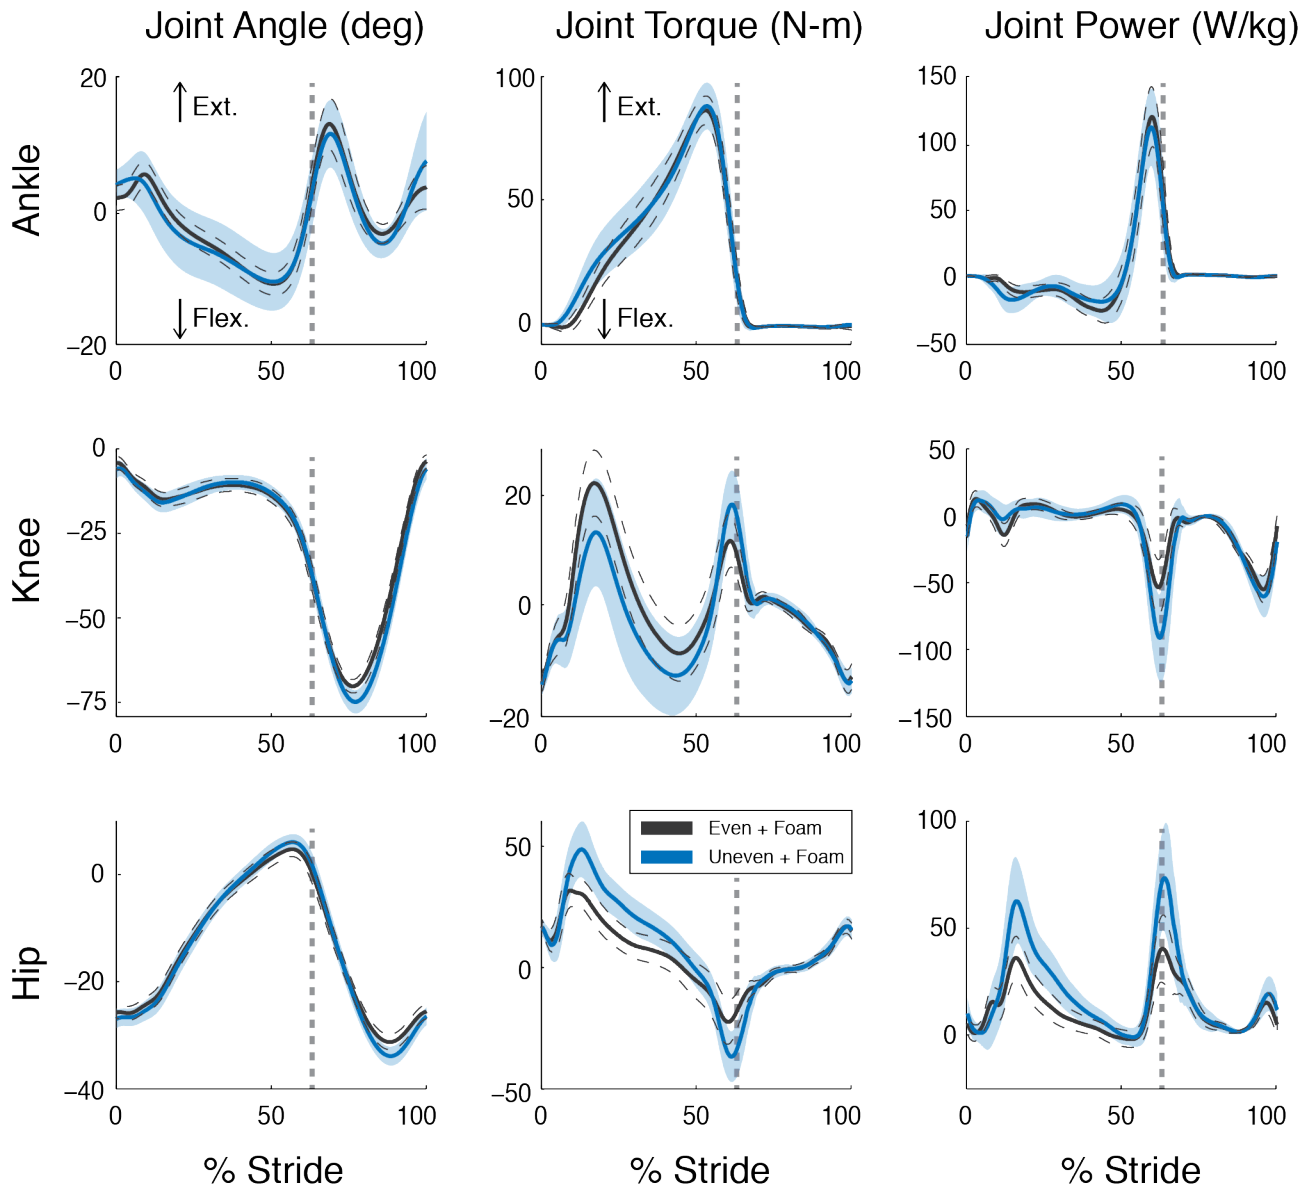

Fig. 3.

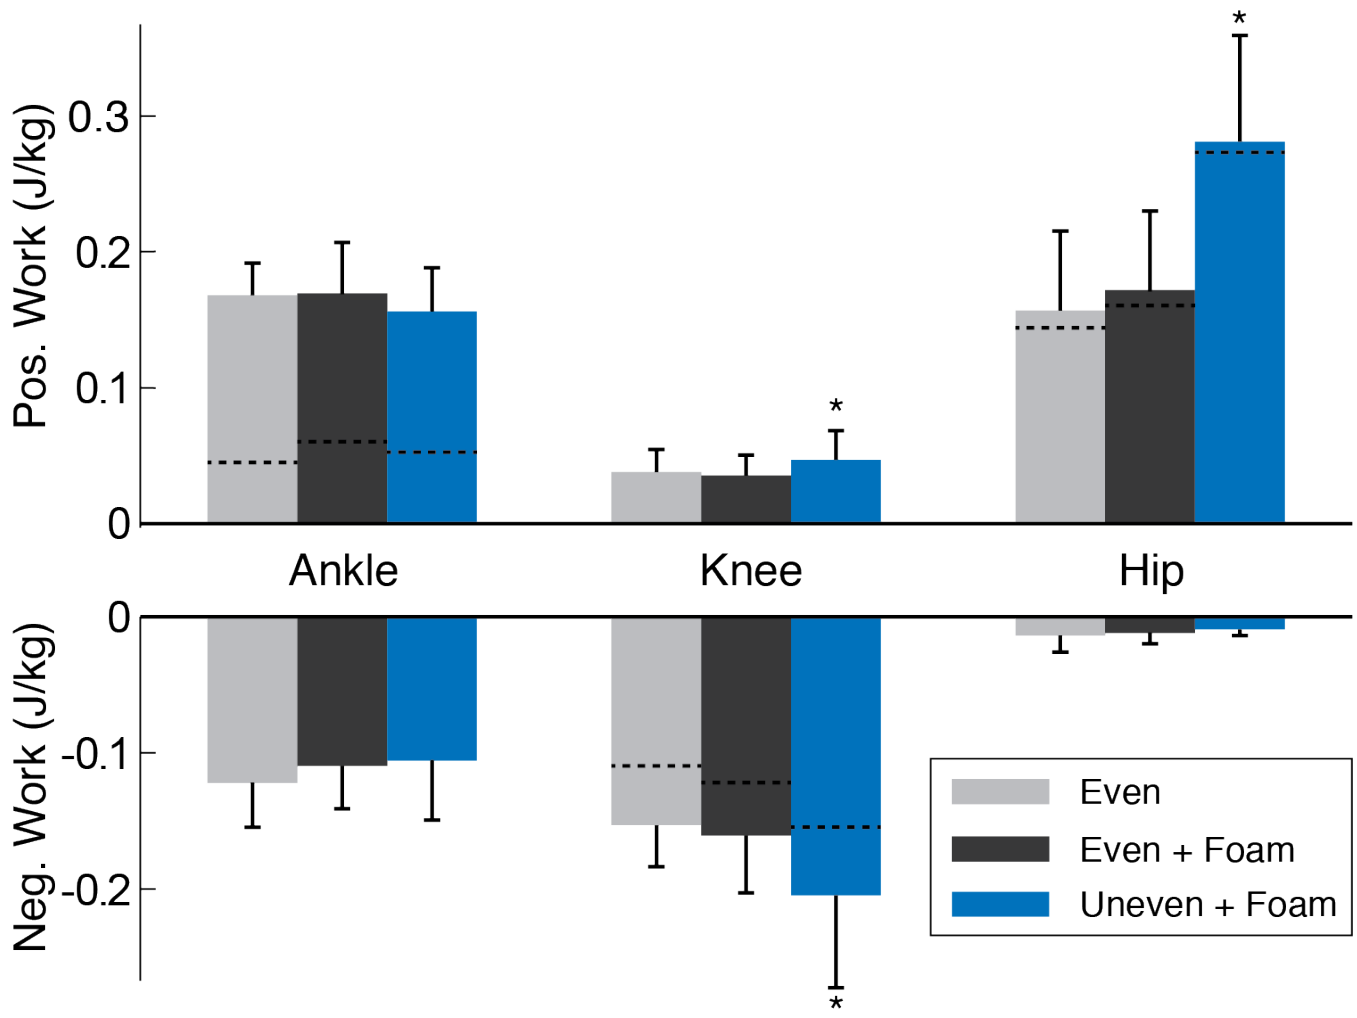

**Fig. 4.**

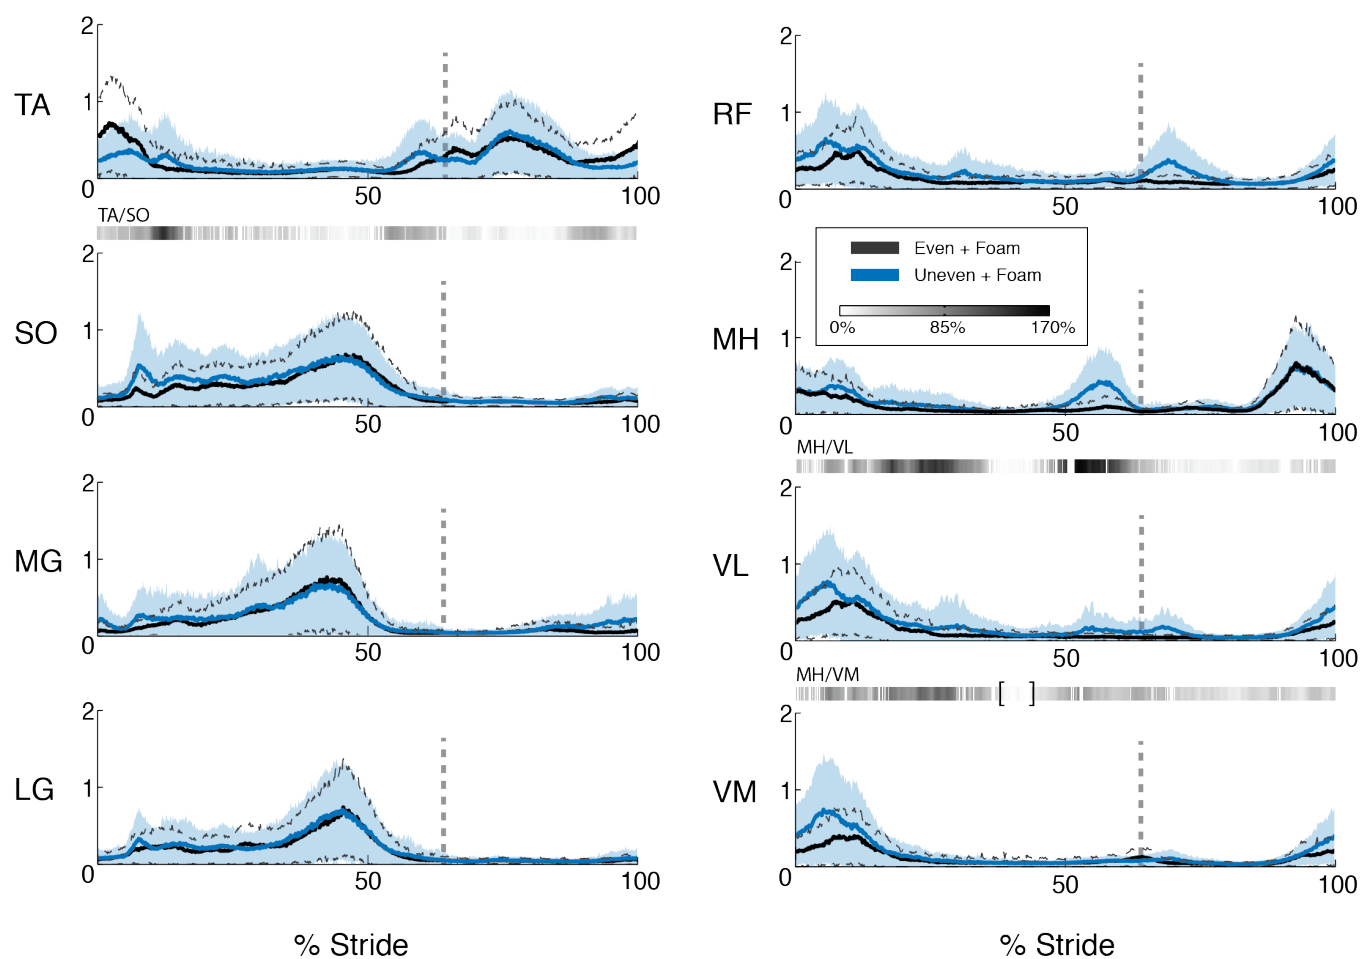

Fig. 5.

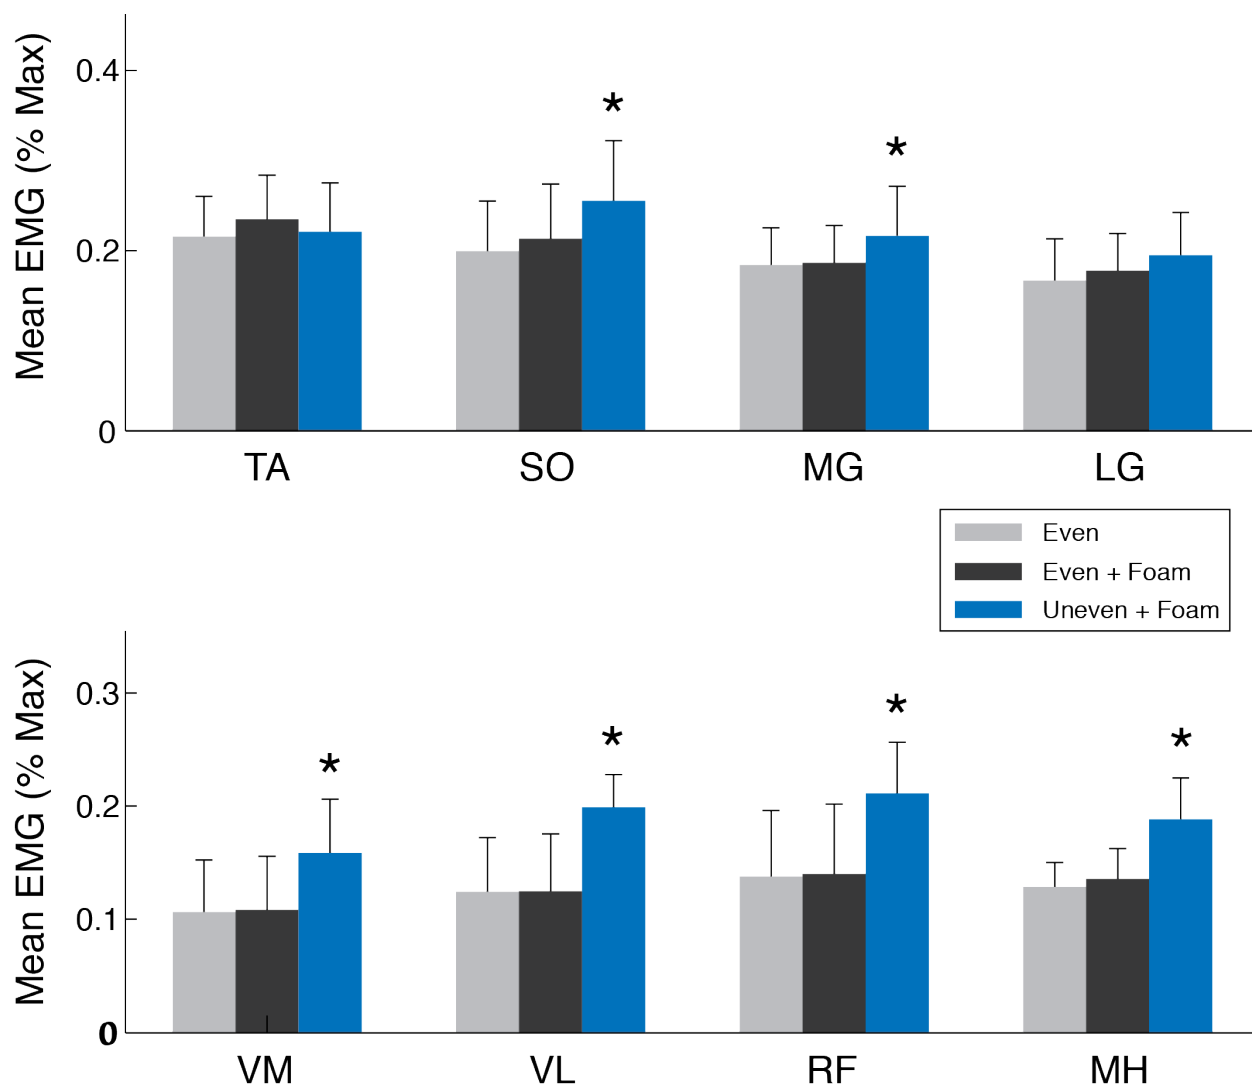



Fig. 6.

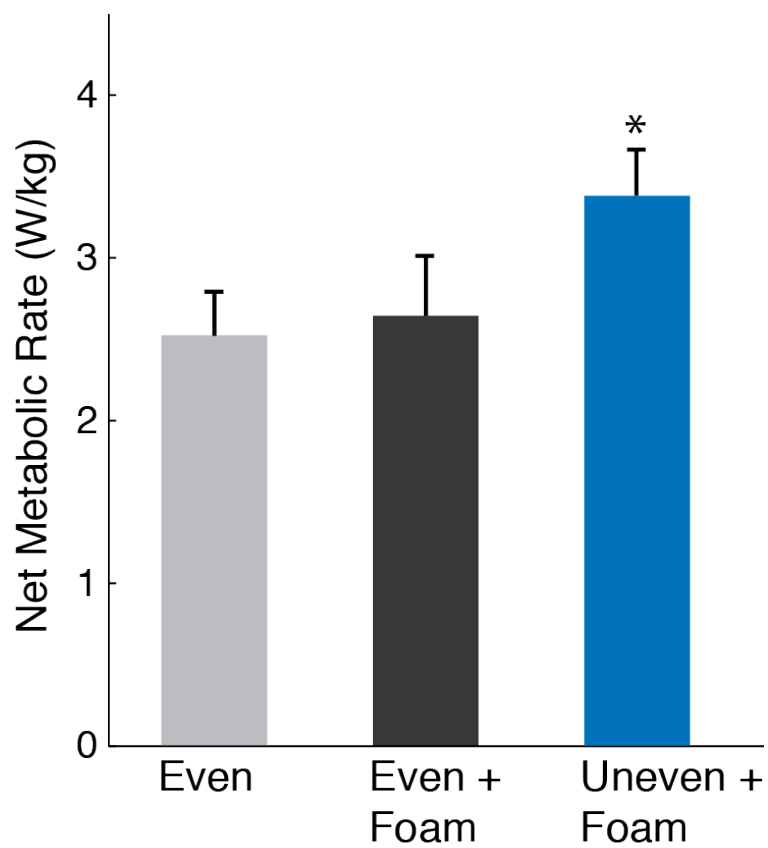

**Fig. 7.**

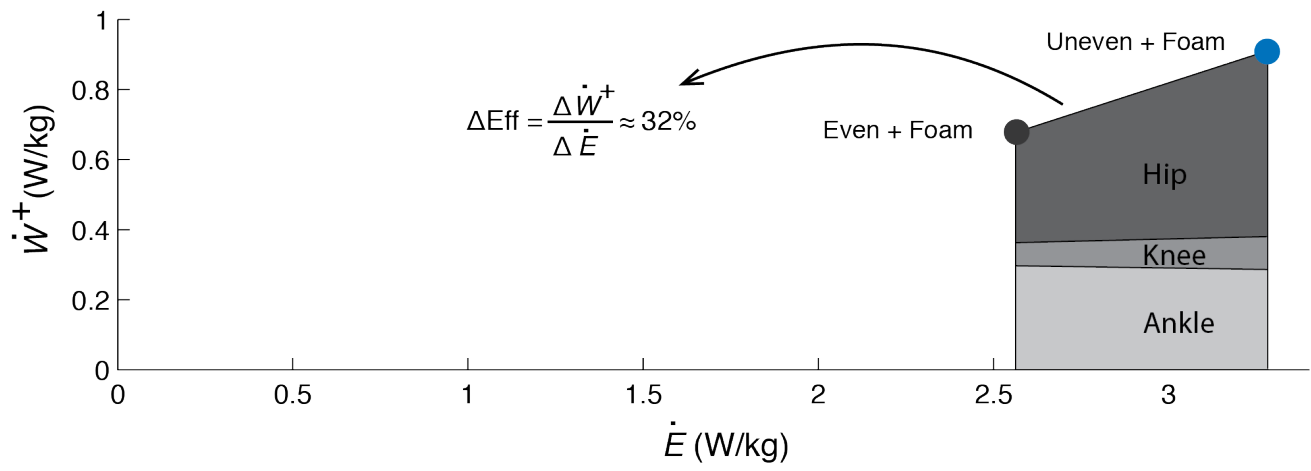

Table 1.

|                      | <i>Even</i>       |                        | <i>Even + Foam</i> |                        | <i>Uneven + Foam</i> |                        | <i>p – value</i> |                  |
|----------------------|-------------------|------------------------|--------------------|------------------------|----------------------|------------------------|------------------|------------------|
|                      | <i>Mean(s.d.)</i> | <i>Step.var.(s.d.)</i> | <i>Mean(s.d.)</i>  | <i>Step.var.(s.d.)</i> | <i>Mean(s.d.)</i>    | <i>Step.var.(s.d.)</i> | <i>Mean</i>      | <i>Step.var.</i> |
| <i>Width</i>         | 0.077 (0.040)     | 0.027 (0.005)          | 0.080 (0.036)      | 0.028 (0.004)          | 0.102 (0.053)        | 0.038* (0.006)         | 0.0336           | 0.0003           |
| <i>Length</i>        | 0.672 (0.020)     | 0.037 (0.009)          | 0.662 (0.025)      | 0.037 (0.008)          | 0.638* (0.024)       | 0.045* (0.007)         | 0.0039           | 0.0006           |
| <i>Height</i>        | ~                 | 0.004 (0.001)          | ~                  | 0.004 (0.001)          | ~                    | 0.008* (0.001)         | ~                | < 0.0001         |
| <i>StepPeriod(s)</i> | 0.568 (0.022)     | 0.013 (0.003)          | 0.560 (0.027)      | 0.014 (0.003)          | 0.540* (0.038)       | 0.018* (0.003)         | 0.0028           | 0.0017           |

**Table 2.**

|              | <i>Even</i> |             | <i>Even + Foam</i> |             | <i>Uneven + Foam</i> |             | <i>p – value</i> |
|--------------|-------------|-------------|--------------------|-------------|----------------------|-------------|------------------|
|              | <i>Mean</i> | <i>s.d.</i> | <i>Mean</i>        | <i>s.d.</i> | <i>Mean</i>          | <i>s.d.</i> |                  |
| <i>TA/SO</i> | 115.5       | 25.59       | 121.6              | 28.48       | 161.3*               | 38.70       | 0.0003           |
| <i>MH/VM</i> | 97.82       | 40.31       | 103.3              | 44.82       | 145.5*               | 52.82       | 0.0061           |
| <i>MH/VL</i> | 102.8       | 26.08       | 107.4              | 33.69       | 165.6*               | 40.41       | 0.0002           |
